# Supplementary material
Source: PubMed Central journal article supplement (PMC7512442)
Supplement: ao0c01674_si_001.pdf [file ao0c01674_si_001.pdf]

# Topology of the U12-U6<sub>atac</sub> snRNA complex of the minor spliceosome and binding by NTC-related protein RBM22

*Joanna Ciavarella<sup>1,3</sup>, William Perea<sup>3</sup>, and Nancy L. Greenbaum<sup>1,2,3\*</sup>*

<sup>1</sup>Ph.D. Program in Chemistry, The Graduate Center of the City University of New York, New York, NY 10016; <sup>2</sup>Ph.D. Program in Biochemistry, The Graduate Center of the City University of New York, New York, NY 10016; <sup>3</sup>Department of Chemistry, Hunter College of the City University of New York, New York, NY 10065

## Supplementary Information

### Nucleotide sequences for constructs.

For the bimolecular construct representing the human U12-U6<sub>atac</sub> snRNA complex, we used the sequence 5'- GAUGCCUUA AACUUUGAGGUAAGGAAA-3', to represent the U12 snRNA and the sequence of, 5'- AUGAAAGGAGAGAAGGUUAGCACUCCCCUUGA-CAAGGAUGGAAGAG -3' to represent the U6<sub>atac</sub> snRNA.

The unimolecular human U12-U6<sub>atac</sub> “chimeric” RNA had the sequence: 5'-GGUGCCUUA AACUUCUUCGGAGGUUAGCACUCCCCUUGACAAGGAUGGAAGAG -3'.

The unimolecular *Arabidopsis* U12-U6<sub>atac</sub> “chimeric” RNA had the sequence: 5'-GGUGCCUUAACUACUUCGGUGGUUGGCAUCUCCUCUGACAGAGAUGGGAUUU -3'.

For the construct representing the human U2-U6 snRNA complex, we used the sequence 5'-CGCUUCUCGGCCUUUUGGCUAAGAUCUUCUCUGUAUCUGUUC-3' to represent the U2 snRNA and 5'- GGGACUAAA AUUGGAACGUACAGAGAGAAGAUUAGCAUGGCCCCU GCGCAAGGAUGACACGAAAUUCGUGAAGCG-3' for the U6 snRNA fragment.

For the construct representing the human U5 snRNA complex, we used the sequence 5'-GGGGATCCACATGGTTCTTGCCTTTT-3'.

### Pairing and folding of RNA samples.

**Figure S-1:** Pairing of equimolar quantities of individual strands of the bimolecular human U2-U6 (A) and U12-U6<sub>atac</sub> (B) snRNA snRNA construct were paired and incubated as described in Experimental Section. Samples were electrophoresed on a 20% non-denaturing PAGE and stained in EtBr. Shifting of the single band of the combined strands and disappearance of the bands of individual strands implies complete pairing and formation of a single conformation. (A) human U2-U6 snRNA (major spliceosome; sequence above, and secondary structural scheme in Fig. 1A in text) strands: Lane 1 = U2 strand; Lane 2 = U6 strand; Lane 3: paired U2 and U6 snRNA strands.

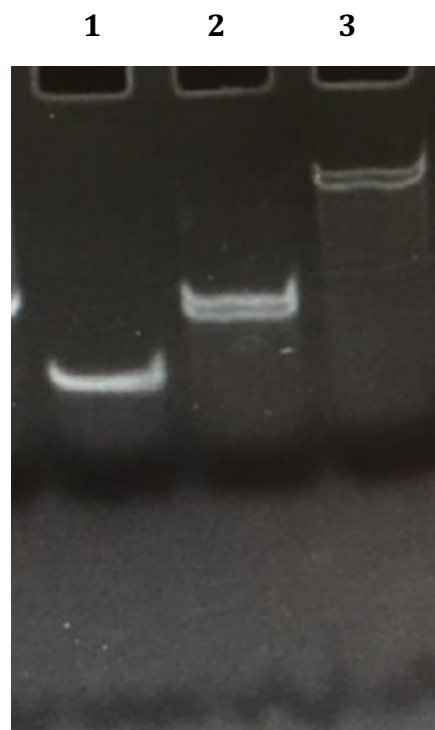

1A

**(B)** human U12-U6<sub>atac</sub> snRNA (minor spliceosome; sequence above, and secondary structural scheme in Fig. 1B in text) strands: Lane 1 = U12 strand; Lane 2 = U6<sub>atac</sub> strand; Lane 3 = paired strands. See Experimental Section (in the text) for details.

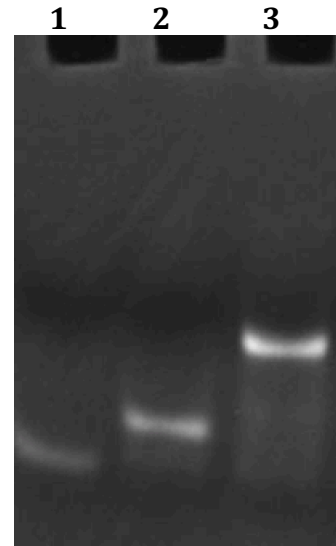

**1B**

**Figure S-2A:** Folding of bimolecular (right) and unimolecular (left) samples of the human U12-U6<sub>atac</sub> snRNA complex; sequences are above, and scheme of predicted folds in Fig. 1B and 2A, respectively). Both samples migrate as single bands, indicating homogeneity of the fold; the additional length of strands in the bimolecular construct results in retarded migration. Samples were prepared and electrophoresed on 20% non-denaturing PAGE as described in Experimental Section and were stained with EtBr. Appearance of a single band for each sample implies that each sample adopted a homogeneous fold. Migration was consistent with formation of the monomer for each unimolecular sample.

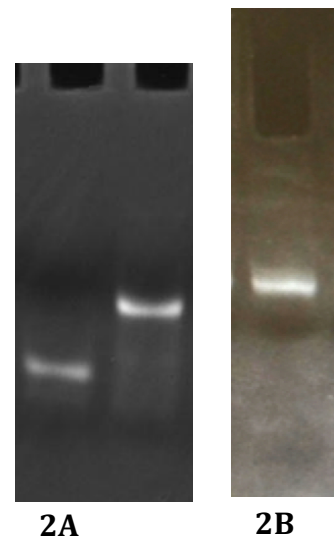

**Figure S-2B:** Folding of the unimolecular sample *Arabidopsis* U12-U6<sub>atac</sub> snRNA complex (right; sequence above, and scheme of predicted fold in Fig. 2B).



**Figure S-5:** 2D Aromatic-anomeric (base-H1') region of a 2D NOESY spectrum of nonexchangeable protons used for analysis of sequential assignments. Nucleotides and connectivities identify base-H1' nOes. The sample was ~0.5 mM RNA in 10mM NaPi, 50 mM NaCl, in 99.996% D<sub>2</sub>O. The spectrum was collected at 600 MHz, at 25 °C, with a mixing time 250 ms. Other acquisition parameters are in Experimental Section.

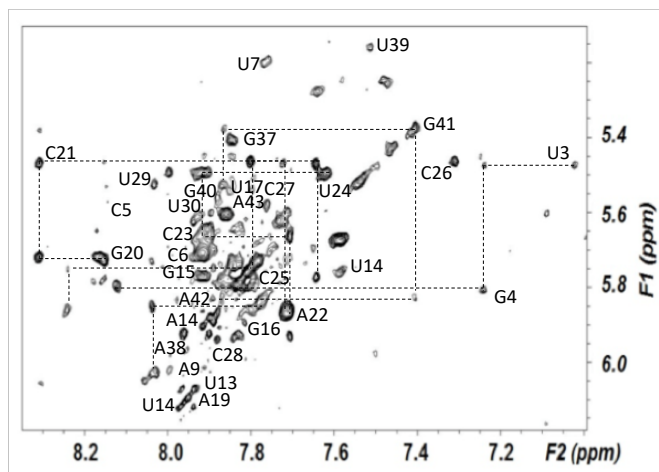

**Figure S-6:** Fluorescence assays to quantify affinity between human RBM22 and the human U12-U6<sub>atac</sub> snRNA complex (Figure 1B) were performed with by mixing 15-30 μM protein with RNA concentrations ranging from 3-42 μM so that each independent sample representing a molar ratio of 0.2:1 - 1.4:1 (RNA:protein) with an excitation at 300 nm and detection of emission at 350 nm. Further details are in Experimental Section. Samples highlighted here include (0.2:1, 0.6:1, 0.8:1, 1:1 for RNA:protein).

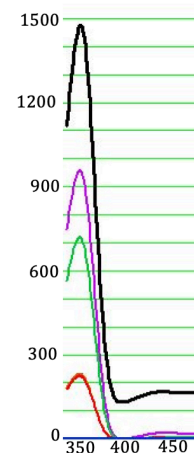

**Figure S-7:** Fluorescence assays to quantify affinity between human RBM22 and the human U2-U6 snRNA complex (Figure 1A) were performed with 15-30  $\mu\text{M}$  RBM22 with RNA concentrations ranging from 3  $\mu\text{M}$ -42  $\mu\text{M}$  so that each independent sample representing a molar ratio of 0.2:1 - 1.4:1 (RNA:protein) with an excitation at 300 nm and detection of emission at 350 nm. Further details are in Experimental Section. Samples highlighted here include (0.2:1, 0.6:1, 0.8:1, 1:1 for RNA:protein).

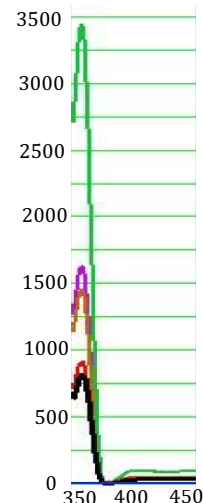

**Figure S-8:** Fluorescence assays for 30  $\mu\text{M}$  RBM22 (left) and 30  $\mu\text{M}$  RBM22 + 30  $\mu\text{M}$  U5 snRNA, a non-binding RNA fragment, (right) with an excitation at 300 nm and detection of emission at 350 nm are highlighted here. This experiment serves as a control to correct for inner filter effects and provided identical results for both assays. Further details are in Experimental Section

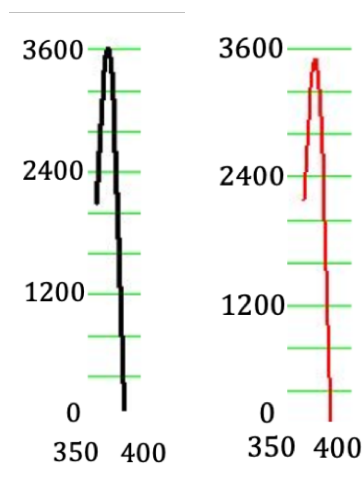

**Table S-1:** NMR Chemical shifts for  $^1\text{H}$  and  $^{15}\text{N}$  (imino) in the human U12-U6<sub>atac</sub> snRNA unimolecular construct (Fig. 2A in text). Shifts were derived from NMR experiments described the Experimental Section/Results in the text and were the same for corresponding nucleotides in the bimolecular construct (Fig. 1B in text).

| Residue | H8/H6 | H5/H2 | H1'  | H2'  | H3'  | H1/H3 | <sup>15</sup> N1/ <sup>15</sup> N3 |
|---------|-------|-------|------|------|------|-------|------------------------------------|
| U3      | 7.75  | 4.58  | 5.41 | 4.29 | 4.51 | 13.93 | 161                                |
| G4      | 7.82  | -     | 5.86 | 4.71 | 4.47 | 12.2  | 143                                |
| C5      | 7.78  | 5.34  | 5.60 | 4.22 | 4.44 | -     | -                                  |
| C6      | 8.03  | 5.84  | 5.71 | 4.31 | 4.37 | -     | -                                  |
| U7      | 7.70  | 4.52  | 5.24 | 4.20 | 4.44 | 13.16 | 157                                |
| U8      | 7.82  | 4.99  | 5.48 | 4.41 | 4.35 | 12.81 | 158                                |
| A9      | 8.36  | 7.42  | 6.07 | 4.46 | 4.88 | -     | -                                  |
| A10     | 8.24  | 7.35  | 5.98 | 4.40 | 4.80 | -     | -                                  |
| A11     | 8.16  | 7.12  | 5.75 | 4.35 | 4.75 | -     | -                                  |
| C12     | 8.07  | 5.86  | 5.74 | 4.28 | 4.32 | -     | -                                  |
| U13     | 8.04  | 5.97  | 6.13 | 4.46 | 4.29 | 10.52 | 156                                |
| U14     | 8.00  | 5.90  | 6.10 | 4.38 | 4.25 | 13.96 | 161                                |
| A14     | 8.09  | 7.10  | 5.87 | 4.24 | 4.60 | -     | -                                  |
| G15     | 7.13  | -     | 5.76 | 4.64 | 4.57 | 11.22 | 142                                |
| G16     | 8.48  | -     | 5.87 | 4.18 | 5.16 | 13.22 | 148                                |
| U17     | 7.85  | 4.68  | 5.56 | 4.35 | 4.57 | 14.21 | 163                                |
| U18     | 7.90  | 4.72  | 5.64 | 4.44 | 4.64 | 14.62 | 164                                |
| A19     | 8.32  | 7.38  | 6.11 | 4.44 | 4.85 | -     | -                                  |
| G20     | 7.88  | -     | 5.78 | 4.61 | 4.72 | 13.46 | 148                                |
| C21     | 7.48  | 5.29  | 5.40 | 4.51 | 4.60 | -     | -                                  |
| A22     | 7.75  | 7.04  | 5.84 | 4.10 | 4.24 | -     | -                                  |
| C23     | 7.84  | 5.33  | 5.65 | 4.25 | 4.30 | -     | -                                  |
| U24     | 7.42  | 4.51  | 5.52 | 4.28 | 4.15 | 10.2  | 153                                |
| C25     | 7.67  | 5.23  | 5.74 | 4.45 | 4.47 | -     | -                                  |
| C26     | 7.73  | 5.41  | 5.56 | 4.15 | 4.31 | -     | -                                  |
| C27     | 7.69  | 5.31  | 5.58 | 4.21 | 4.45 | -     | -                                  |
| C28     | 7.75  | 5.51  | 5.92 | 4.07 | 4.16 | -     | -                                  |
| U29     | 7.83  | 4.64  | 5.52 | 4.36 | 4.22 | 13.5  | 162                                |
| U30     | 7.86  | 4.70  | 5.61 | 4.53 | 4.32 | 13.8  | 165                                |
| G31     | 7.76  | -     | 5.88 | 4.39 | 4.69 | 12.43 | 146                                |
| A32     | 8.08  | 7.05  | 5.93 | 4.22 | 4.36 | -     | -                                  |
| C33     | 7.82  | 5.62  | 5.51 | 4.31 | 4.53 | -     | -                                  |
| A34     | 8.11  | 8.08  | 5.65 | 4.28 | 4.45 | -     | -                                  |
| A35     | 8.20  | 7.30  | 5.84 | 4.38 | 4.64 | -     | -                                  |
| G36     | 6.95  | -     | 5.21 | 4.21 | 4.01 | 12.54 | 147                                |
| G37     | 6.82  | -     | 5.32 | 4.25 | 4.08 | 12.73 | 149                                |
| A38     | 8.41  | 7.48  | 5.92 | 4.49 | 4.92 | -     | -                                  |
| U39     | 7.64  | 4.17  | 5.21 | 4.28 | 4.16 | 13.16 | 151                                |
| G40     | 8.23  | -     | 5.52 | 4.42 | 4.71 | 13.12 | 150                                |
| G41     | 6.89  | -     | 5.45 | 4.32 | 4.29 | 11.62 | 140                                |
| A42     | 8.02  | 7.52  | 5.83 | 4.18 | 4.32 | -     | -                                  |
| A43     | 7.98  | 7.01  | 5.68 | 4.16 | 4.28 | -     | -                                  |

**Table S-2:** NMR Chemical shifts for  $^1\text{H}$  in the *Arabidopsis* U12-U6<sub>atac</sub> snRNA unimolecular construct (Fig. 2B in text) for select nucleotides in and surrounding the single-stranded hinge region of the ISL. Shifts were derived from NMR experiments described in Experimental Section/Results in the text.

| Residue | H8/H6 | H5/H2 | H1'  | H2'  | H3'  | H1/H3 |
|---------|-------|-------|------|------|------|-------|
| G26     | 7.16  | -     | 5.74 | 4.61 | 4.61 | 11.31 |
| G27     | 8.45  | -     | 5.86 | 4.22 | 5.18 | 12.46 |
| C28     | 7.45  | 5.32  | 5.43 | 4.50 | 4.62 | -     |
| A29     | 7.73  | 7.01  | 5.86 | 4.12 | 4.21 | -     |
| U30     | 7.80  | 4.64  | 5.61 | 4.27 | 4.31 | 13.1  |
| C31     | 7.72  | 5.36  | 5.61 | 4.28 | 4.31 | -     |
| U32     | 7.40  | 4.54  | 5.55 | 4.29 | 4.12 | 10.3  |
| C33     | 7.65  | 5.25  | 5.51 | 4.44 | 4.48 | -     |

**Table S-3:** Distances measured for inter-nucleotide steps for nucleotides in the ISL of single-stranded vs. double-stranded regions in the unimolecular human U12-U6<sub>atac</sub> snRNA complex. See Fig. 2A in the text for the construct and Experimental Section/Results for experimental details. For each dinucleotide step, interproton distances were measured for aromatic<sub>n</sub>-aromatic<sub>n+1</sub> and anomeric<sub>n</sub>-aromatic<sub>n+1</sub> distances.

| single-stranded nucleotide step | H6/H8-H6/H8 distance (Å) | H1'-H6/H8 distance (Å) | double-stranded (control) nucleotide step | H6/H8-H6/H8 Distance (Å) | H1'-H6/H8 distance (Å) |
|---------------------------------|--------------------------|------------------------|-------------------------------------------|--------------------------|------------------------|
| A22-C23                         | 4.7                      | 4.8                    | A11-C12                                   | 3.2                      | 3.4                    |
| C23-U24                         | 4.5                      | 4.7                    | CU12-U13/<br>C28-U29                      | 3.0/ 3.1                 | 3.3                    |



**Table S-4:** Distances measured for inter-nucleotide steps for nucleotides in the ISL of single-stranded vs. double-stranded regions in the unimolecular *Arabidopsis* U12-U6<sub>atac</sub> snRNA complex. See Fig. 2B in the text for the construct and Experimental Section/Results for experimental details. For each dinucleotide step, interproton distances were measured for aromatic<sub>n</sub>-aromatic<sub>n+1</sub> and anomeric<sub>n</sub>-aromatic<sub>n+1</sub> distances.

| single-stranded Nucleotide Step | H6/H8-H6/H8 distance (Å) | H1'-H6/H8 distance (Å) | double-stranded (control) nucleotide Step | H6/H8-H6/H8 distance (Å) | H1'-H6/H8 distance (Å) |
|---------------------------------|--------------------------|------------------------|-------------------------------------------|--------------------------|------------------------|
| C28-A29                         | 4.6                      | 4.8                    | C40-A41                                   | 3.2                      | 3.5                    |
| A29-U30                         | 4.3                      | 4.6                    | A11-C12                                   | 3.3                      | 3.6                    |
